# Supplementary material for: Facile synthesis of a continuous thin Cu(bipy)2(SiF6) membrane with selectivity towards hydrogen
Source: Royal Society of Chemistry journal article supplement (doi:10.1039/c3ta11604b), 2013-01-01
Supplement: c3ta11604b.pdf [file c3ta11604b.pdf]

Supporting information for  
**Facile synthesis of continuous thin  $\text{Cu}(\text{bipy})_2(\text{SiF}_6)$  membrane  
with selectivity towards hydrogen**

Songjie Fan,<sup>b</sup> Fuxing Sun,<sup>\*b</sup> Jijiang Xie,<sup>\*a</sup> Jin Guo,<sup>a</sup> Laiming Zhang,<sup>a</sup> Chunrui, Wang,<sup>a</sup>  
Qikun Pan,<sup>a</sup> Guangshan Zhu<sup>\*bc</sup>

<sup>a</sup> *State Key Laboratory of Laser Interaction with Matter, Changchun Institute of Optics, Fine Mechanics and Physics, Changchun, 130012, P. R. China. Fax: +86 431 84668231; Tel: +86 431 86176196. E-mail: laserxjj@163.com.*

<sup>b</sup> *State Key Laboratory of Inorganic Synthesis and Preparative Chemistry, Jilin University, Changchun, 130012, P. R. China. Fax: +86 431 85168331; Tel: +86 431 85168331. E-mail: zhugs@jlu.edu.cn.*

<sup>c</sup> *Queensland Micro- and Nanotechnology Centre, Griffith University, Queensland, 4111, Australia*

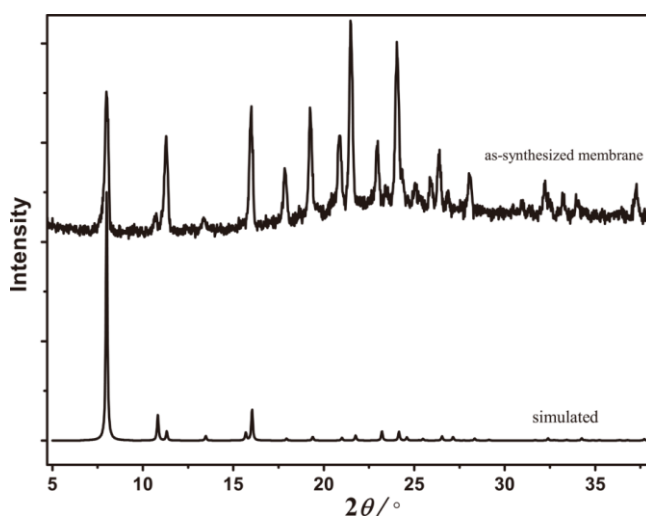

**Fig. S1** PXRD patterns of the as-synthesized membrane (up) and simulated from the structure (below).

**Table S1** Single and binary gas permeances ( $\text{mol}\cdot\text{m}^{-2}\cdot\text{s}^{-1}\cdot\text{Pa}^{-1}$ ) and separation factors for the  $\text{Cu}(\text{bpy})_2(\text{SiF}_6)$  membrane at 293 K and 1 bar. The volume ratio for binary gas systems is 1:1.

| Gas(i/j)                  | Knudsen constant | Performances of the $\text{Cu}(\text{bpy})_2(\text{SiF}_6)$ membrane                      |                                                                                           |                         |                                                                                                        |                                                                                           |                   |
|---------------------------|------------------|-------------------------------------------------------------------------------------------|-------------------------------------------------------------------------------------------|-------------------------|--------------------------------------------------------------------------------------------------------|-------------------------------------------------------------------------------------------|-------------------|
|                           |                  | Single gas                                                                                |                                                                                           |                         | Binary gas                                                                                             |                                                                                           |                   |
|                           |                  | Permeances (i)<br>( $\text{mol}\cdot\text{m}^{-2}\cdot\text{s}^{-1}\cdot\text{Pa}^{-1}$ ) | Permeances (j)<br>( $\text{mol}\cdot\text{m}^{-2}\cdot\text{s}^{-1}\cdot\text{Pa}^{-1}$ ) | Ideal separation factor | Permeances ( $\text{H}_2$ )<br>( $\text{mol}\cdot\text{m}^{-2}\cdot\text{s}^{-1}\cdot\text{Pa}^{-1}$ ) | Permeances (j)<br>( $\text{mol}\cdot\text{m}^{-2}\cdot\text{s}^{-1}\cdot\text{Pa}^{-1}$ ) | Separation factor |
| $\text{H}_2/\text{CH}_4$  | 2.8              | $3.00 \times 10^{-7}$                                                                     | $4.29 \times 10^{-8}$                                                                     | 7.0                     | $2.70 \times 10^{-7}$                                                                                  | $3.60 \times 10^{-8}$                                                                     | 7.5               |
| $\text{H}_2/\text{N}_2$   | 3.7              | $3.00 \times 10^{-7}$                                                                     | $4.40 \times 10^{-8}$                                                                     | 6.8                     | $2.70 \times 10^{-7}$                                                                                  | $4.00 \times 10^{-8}$                                                                     | 6.8               |
| $\text{H}_2/\text{CO}_2$  | 4.7              | $3.00 \times 10^{-7}$                                                                     | $3.85 \times 10^{-8}$                                                                     | 7.8                     | $2.80 \times 10^{-7}$                                                                                  | $3.50 \times 10^{-8}$                                                                     | 8.0               |
| $\text{CO}_2/\text{CH}_4$ | 0.6              | $3.85 \times 10^{-8}$                                                                     | $4.29 \times 10^{-8}$                                                                     | 0.90                    | /                                                                                                      | /                                                                                         | /                 |
| $\text{CO}_2/\text{N}_2$  | 0.8              | $3.85 \times 10^{-8}$                                                                     | $4.40 \times 10^{-8}$                                                                     | 0.88                    | /                                                                                                      | /                                                                                         | /                 |

**Table S2** Single and binary gas permeances ( $\text{mol}\cdot\text{m}^{-2}\cdot\text{s}^{-1}\cdot\text{Pa}^{-1}$ ) and separation factors for the  $\text{Cu}(\text{bpy})_2(\text{SiF}_6)$  membrane at 1 bar and different temperatures. The volume ratio for binary gas systems is 1:1.

| Gas( $\text{H}_2$ /j)    | Temperature (K) | Single gas                                                                                             |                                                                                           |                         | Binary gas                                                                                             |                                                                                           |                   |
|--------------------------|-----------------|--------------------------------------------------------------------------------------------------------|-------------------------------------------------------------------------------------------|-------------------------|--------------------------------------------------------------------------------------------------------|-------------------------------------------------------------------------------------------|-------------------|
|                          |                 | Permeances ( $\text{H}_2$ )<br>( $\text{mol}\cdot\text{m}^{-2}\cdot\text{s}^{-1}\cdot\text{Pa}^{-1}$ ) | Permeances (j)<br>( $\text{mol}\cdot\text{m}^{-2}\cdot\text{s}^{-1}\cdot\text{Pa}^{-1}$ ) | Ideal separation factor | Permeances ( $\text{H}_2$ )<br>( $\text{mol}\cdot\text{m}^{-2}\cdot\text{s}^{-1}\cdot\text{Pa}^{-1}$ ) | Permeances (j)<br>( $\text{mol}\cdot\text{m}^{-2}\cdot\text{s}^{-1}\cdot\text{Pa}^{-1}$ ) | Separation factor |
| $\text{H}_2/\text{CO}_2$ | 313             | $5.22 \times 10^{-7}$                                                                                  | $1.00 \times 10^{-7}$                                                                     | 5.2                     | $4.30 \times 10^{-7}$                                                                                  | $9.00 \times 10^{-8}$                                                                     | 4.8               |
|                          | 343             | $5.50 \times 10^{-7}$                                                                                  | $1.10 \times 10^{-7}$                                                                     | 5.0                     | $4.40 \times 10^{-7}$                                                                                  | $1.00 \times 10^{-7}$                                                                     | 4.4               |
| $\text{H}_2/\text{CH}_4$ | 313             | $5.22 \times 10^{-7}$                                                                                  | $1.09 \times 10^{-7}$                                                                     | 4.8                     | $4.54 \times 10^{-7}$                                                                                  | $1.10 \times 10^{-7}$                                                                     | 4.1               |
|                          | 343             | $5.50 \times 10^{-7}$                                                                                  | $1.26 \times 10^{-7}$                                                                     | 4.4                     | $5.00 \times 10^{-7}$                                                                                  | $1.23 \times 10^{-7}$                                                                     | 4.1               |
| $\text{H}_2/\text{N}_2$  | 313             | $5.25 \times 10^{-7}$                                                                                  | $9.48 \times 10^{-8}$                                                                     | 5.5                     | $3.40 \times 10^{-7}$                                                                                  | $6.00 \times 10^{-8}$                                                                     | 5.7               |
|                          | 343             | $5.50 \times 10^{-7}$                                                                                  | $1.30 \times 10^{-7}$                                                                     | 4.2                     | $4.80 \times 10^{-7}$                                                                                  | $1.16 \times 10^{-7}$                                                                     | 4.1               |
